# Supplementary material for: Food Insecurity Is Associated With Cardiovascular and All‐Cause Mortality Among Adults in the United States
Source: PubMed Central journal article supplement — J Am Heart Assoc. 2020 Sep 14;9(19):e014629. doi: 10.1161/JAHA.119.014629 (PMC7792411; doi:10.1161/jaha.119.014629), 2020-09-14
Supplement: JAH3-9-e014629-s001.pdf [file JAH3-9-e014629-s001.pdf]

# **SUPPLEMENTAL MATERIAL**

**Table S1. Questions used to assess the adult food security in the U.S. Food Security Survey**

**Module.**

---

**Questions about food conditions of the household as a whole**

1. “We worried whether our food would run out before we got money to buy more.” Was that often, sometimes, or never true for you in the last 12 months?
2. “The food that we bought just didn’t last and we didn’t have money to get more.” Was that often, sometimes, or never true for you in the last 12 months?
3. “We couldn’t afford to eat balanced meals.” Was that often, sometimes, or never true for you in the last 12 months?

---

**Questions about food conditions of adults in the household**

4. In the last 12 months, did you or other adults in the household ever cut the size of your meals or skip meals because there wasn’t enough money for food? (Yes/No)
  5. (If yes to question 4) How often did this happen—almost every month, some months but not every month, or in only 1 or 2 months?
  6. In the last 12 months, did you ever eat less than you felt you should because there wasn’t enough money for food? (Yes/No)
  7. In the last 12 months, were you ever hungry, but didn’t eat, because there wasn’t enough money for food? (Yes/No)
  8. In the last 12 months, did you lose weight because there wasn’t enough money for food? (Yes/No)
  9. In the last 12 months did you or other adults in your household ever not eat for a whole day because there wasn’t enough money for food? (Yes/No)
  10. (If yes to question 9) How often did this happen—almost every month, some months but not every month, or in only 1 or 2 months?
-

**Table S2 Stratified associations of marginal, low and very low food security and mortality by sex, race/ethnicity and household income among 27,188 U.S. adults aged 40 years or older, NHANES 1999-2014.**

|                     |           | High food security | Marginal food security | Low food security | Very low food security | <i>P</i> for interaction |
|---------------------|-----------|--------------------|------------------------|-------------------|------------------------|--------------------------|
| All-cause mortality |           |                    |                        |                   |                        |                          |
| Age                 |           |                    |                        |                   |                        |                          |
|                     | 40-64     | Ref                | 1.25(1.01, 1.57)       | 1.21(0.97, 1.50)  | 1.20(0.92, 1.56)       | 0.003                    |
|                     | ≥65       | Ref                | 1.16(0.93, 1.45)       | 1.13(0.94, 1.36)  | 1.29(0.97, 1.71)       |                          |
| Sex                 |           |                    |                        |                   |                        |                          |
|                     | Male      | Ref                | 1.17(0.93, 1.47)       | 1.22(0.97, 1.53)  | 1.11(0.84, 1.48)       | 0.12                     |
|                     | Female    | Ref                | 1.30(1.08, 1.58)       | 1.19(0.96, 1.46)  | 1.58(1.19, 2.09)       |                          |
| Race/ethnicity      |           |                    |                        |                   |                        |                          |
|                     | White     | Ref                | 1.27(1.02, 1.59)       | 1.29(1.02, 1.64)  | 1.47(1.09, 1.99)       | 0.10                     |
|                     | Non-white | Ref                | 1.14(0.95, 1.36)       | 1.05(0.87, 1.27)  | 1.10(0.89, 1.38)       |                          |
| CVD mortality       |           |                    |                        |                   |                        |                          |
| Age                 |           |                    |                        |                   |                        |                          |
|                     | 40-64     | Ref                | 1.48(0.89, 2.48)       | 0.91(0.55, 1.52)  | 1.10(0.61, 1.98)       | 0.99                     |
|                     | ≥65       | Ref                | 1.16(0.80, 1.67)       | 1.30(0.87, 1.94)  | 1.96(1.23, 3.10)       |                          |
| Sex                 |           |                    |                        |                   |                        |                          |
|                     | Male      | Ref                | 1.58(1.09, 2.29)       | 1.17(0.75, 1.82)  | 1.38(0.74, 2.58)       | 0.97                     |
|                     | Female    | Ref                | 1.01(0.64, 1.59)       | 1.05(0.60, 1.82)  | 1.86(1.08, 3.19)       |                          |
| Race/ethnicity      |           |                    |                        |                   |                        |                          |
|                     | White     | Ref                | 1.32(0.86, 2.03)       | 1.02(0.66, 1.57)  | 1.73(1.05, 2.86)       | 0.78                     |
|                     | Non-white | Ref                | 1.27(0.92, 1.76)       | 1.21(0.77, 1.90)  | 1.27(0.73, 2.23)       |                          |

Based on Multivariable Adjusted Model 1.
